# Supplementary material for: Production of the cyanogenic glycoside dhurrin in yeast
Source: PubMed Central journal article supplement — Metab Eng Commun. 2019 May 1;9:e00092. doi: 10.1016/j.mec.2019.e00092 (PMC6512747; doi:10.1016/j.mec.2019.e00092), 2019-05-01
Supplement: mmc1.pdf [file mmc1.pdf]

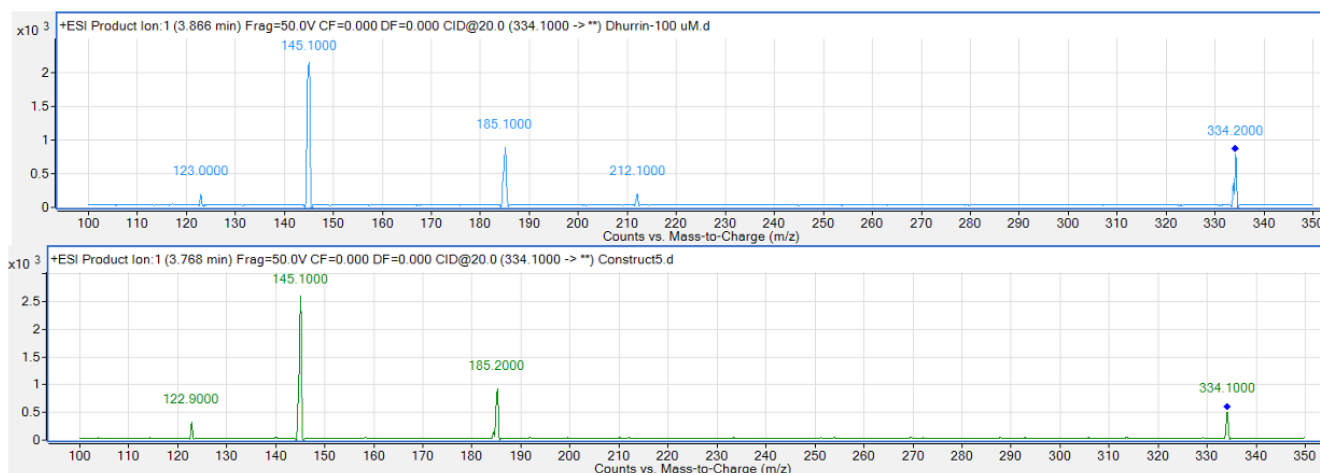

**Figure S1: Mass spectrum of yeast-derived dhurrin and authentic standard.** Above: Product ion mass spectrum of 100  $\mu$ M dhurrin standard (Sigma). Below: Product ion mass spectrum of CSY1214 culture medium after 48 hours growth.

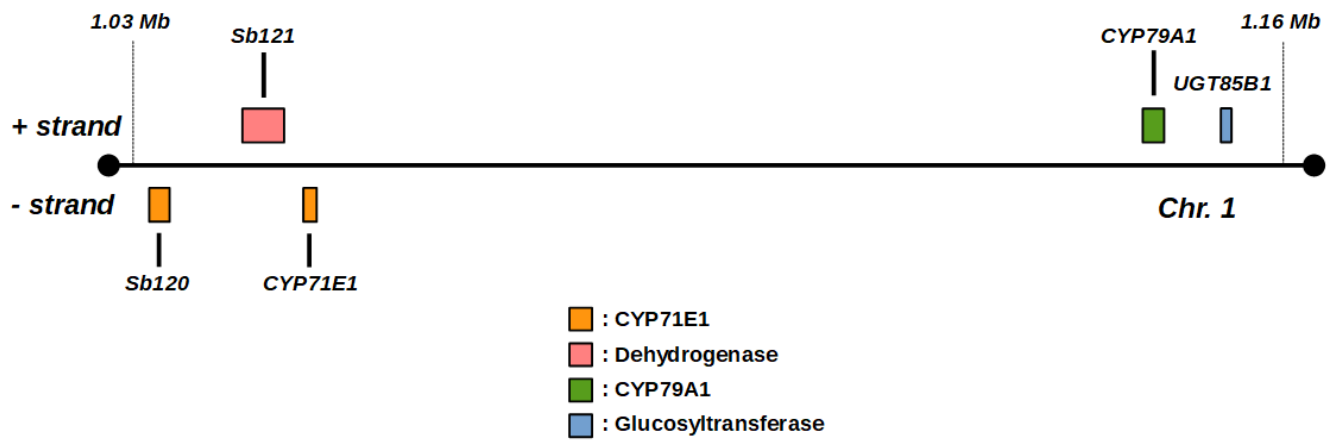

**Figure S2: Illustration of the genomic context of the dhurrin pathway in *S. bicolor*.** Enzymes in the dhurrin pathway and others characterized in this work are shown as they appear in the *S. bicolor* genome; color-coding indicates enzymes' predicted classification.

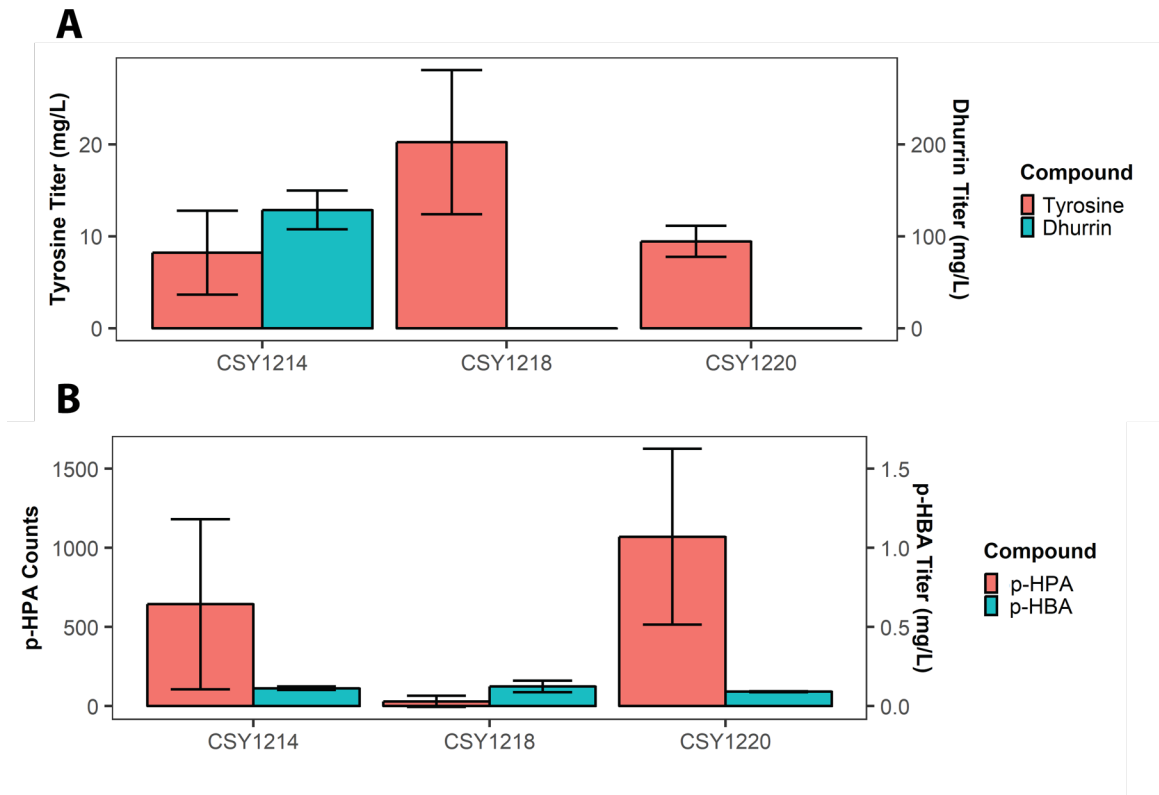

**Figure S3: Effects of replacing CYP71E1 with Sb120 in a dhurrin pathway module. A:** Tyrosine and dhurrin titers after 48 hours growth in plate culture. **B:** *p*-hydroxyphenylacetaldoxime (“p-HPA”) ion counts and *p*-hydroxybenzylaldehyde (“p-HBA”) titers after 48 hours growth in plate culture. CSY1214 is the complete dhurrin pathway expression strain, CSY1218 is the selection marker-matched control strain, and CSY1220 is identical to CSY1214, except that it expresses Sb120 in place of CYP71E1.

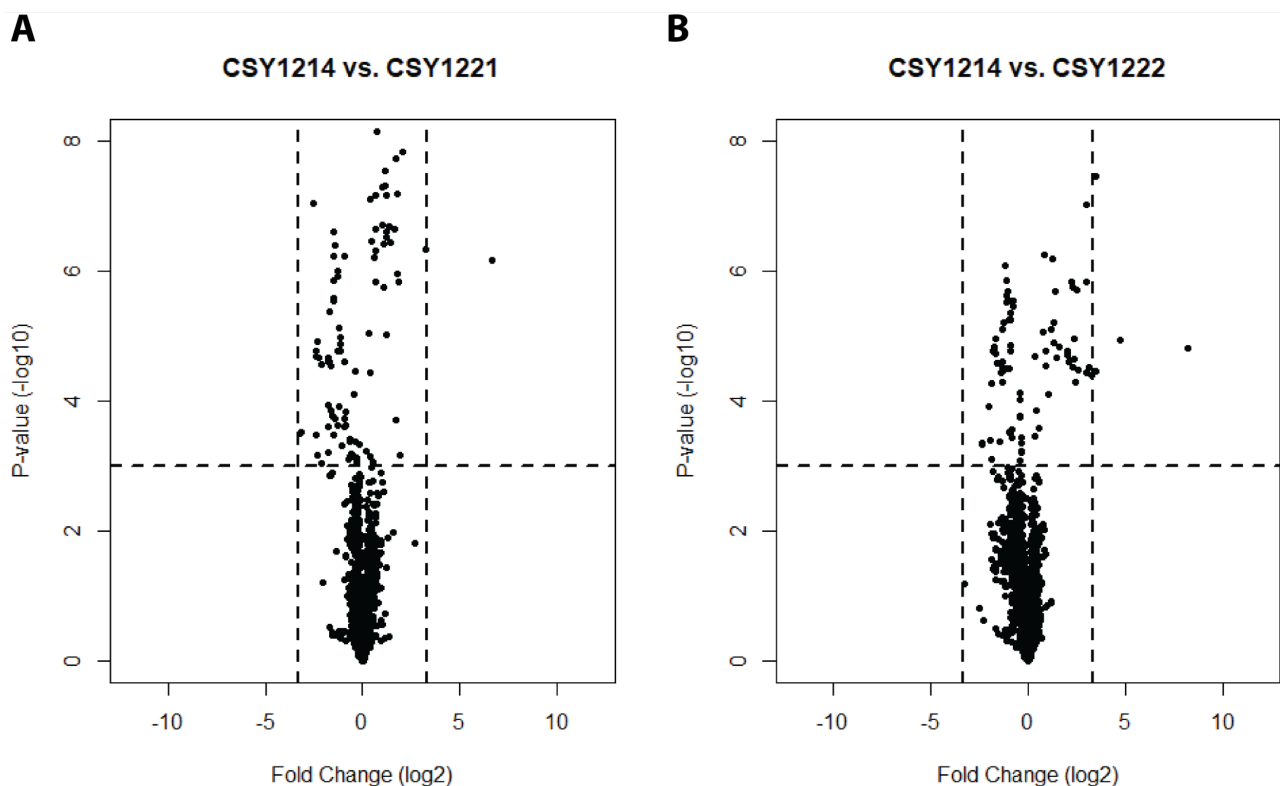

**Figure S4: Untargeted metabolomic analysis of Sb120, Sb121 expression in dhurrin-producing strains.** **A:** Volcano plot of fold changes and *t*-test significance values for detected ion abundances in qTOF analysis of CSY1221 (CSY1214 + Sb120 expression strain) culture supernatant, using CSY1214 (complete dhurrin pathway expression strain) as the reference for comparison. **B:** as in A, but analyzing CSY1222 (CSY1214 + Sb121 expression strain) with CSY1214 as the reference. Vertical lines indicate a tenfold change in mean ion abundance; horizontal lines mark the threshold of a Bonferonni-corrected significance test (original p-value threshold 0.05).

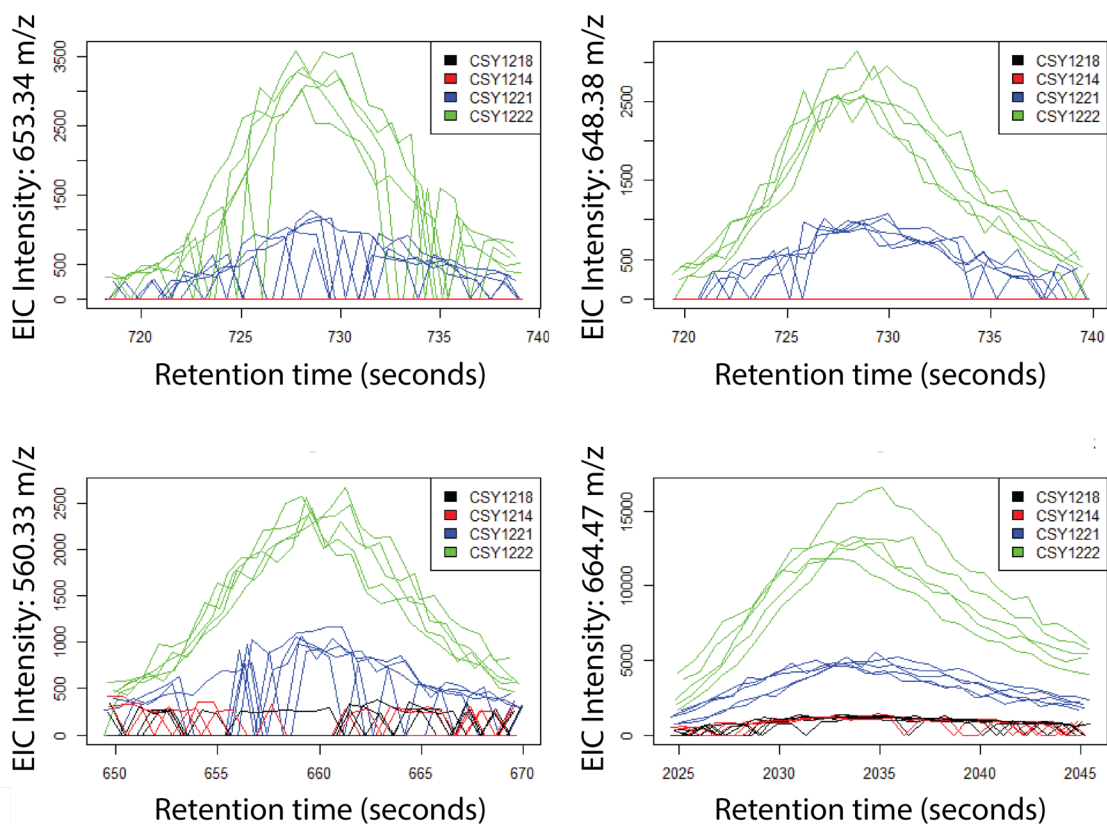

**Figure S5: Chromatograms of candidate differentially produced ions in Sb120, Sb121 expression in dhurrin-producing strains.** Extracted ion chromatograms are displayed for the four ions identified as potentially differentially expressed by untargeted metabolomics; strains tested are CSY1214 (dhurrin pathway expression strain), CSY1218 (selection marker-matched control strain with no *Sorghum* enzymes expressed), CSY1221 (CSY1214 + Sb120 expression strain), and CSY1222 (CSY1214 + Sb121 expression strain).

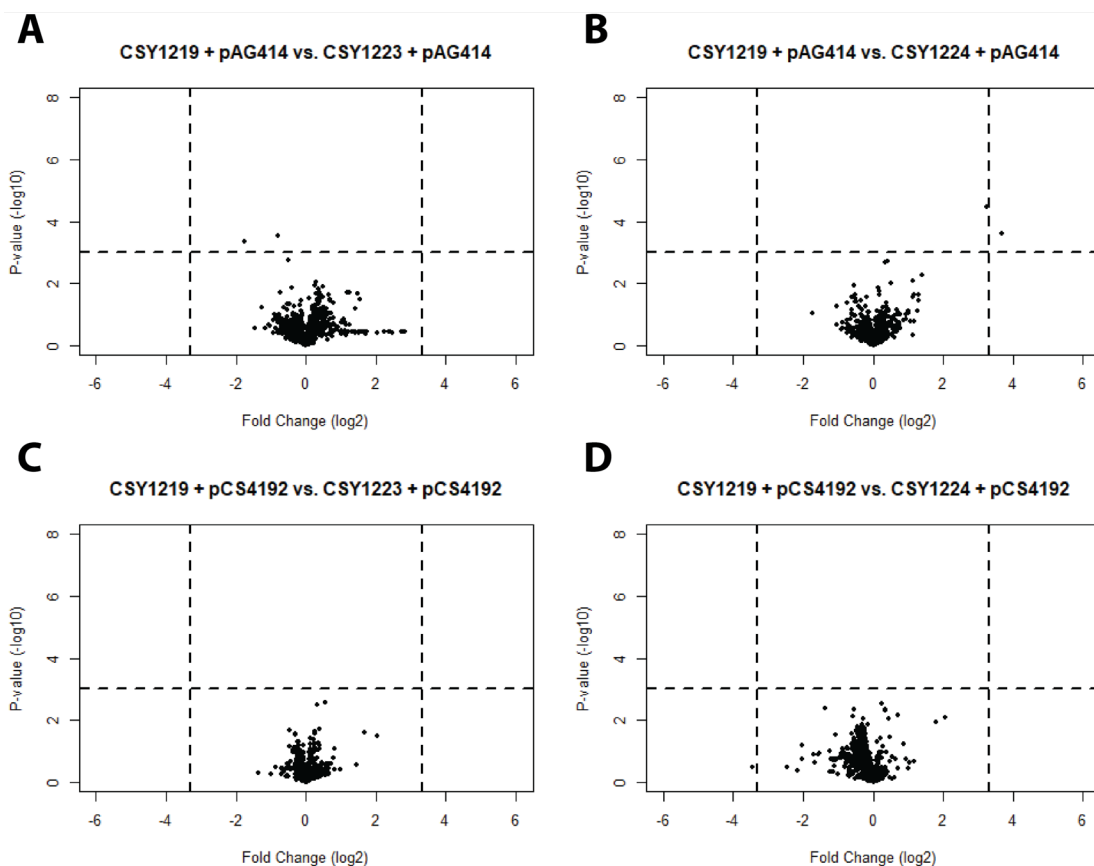

**Figure S6: Untargeted metabolomic analysis of Sb120, Sb121 expression in partial dhurrin pathways.** **A:** Volcano plot of fold changes and *t*-test significance values for detected ion abundances in qTOF analysis of CSY1223 (partial dhurrin pathway strain expressing SbCYP79A1 and Sb120) + pAG414 (selection marker control plasmid) culture supernatant, using CSY1219 (partial dhurrin pathway strain expressing SbCYP79A1) + pAG414 as the reference for comparison. **B:** Volcano plot of fold changes and *t*-test significance values for detected ion abundances in qTOF analysis of CSY1224 (partial dhurrin pathway strain expressing SbCYP79A1 and Sb121) + pAG414 culture supernatant, using CSY1219 + pAG414 as the reference for comparison. **C:** Volcano plot of fold changes and *t*-test significance values for detected ion abundances in qTOF analysis of CSY1223 + pCS4192 (plasmid expressing CYP71E1) culture supernatant, using CSY1219 + pCS4192 as the reference for comparison. **D:** Volcano plot of fold changes and *t*-test significance values for detected ion abundances in qTOF analysis of CSY1224 + pCS4192 culture supernatant, using CSY1219 + pCS4192 as the reference for comparison. Vertical lines indicate a tenfold change in mean ion abundance; horizontal lines mark the threshold of a Bonferonni-corrected significance test (original p-value threshold 0.05).

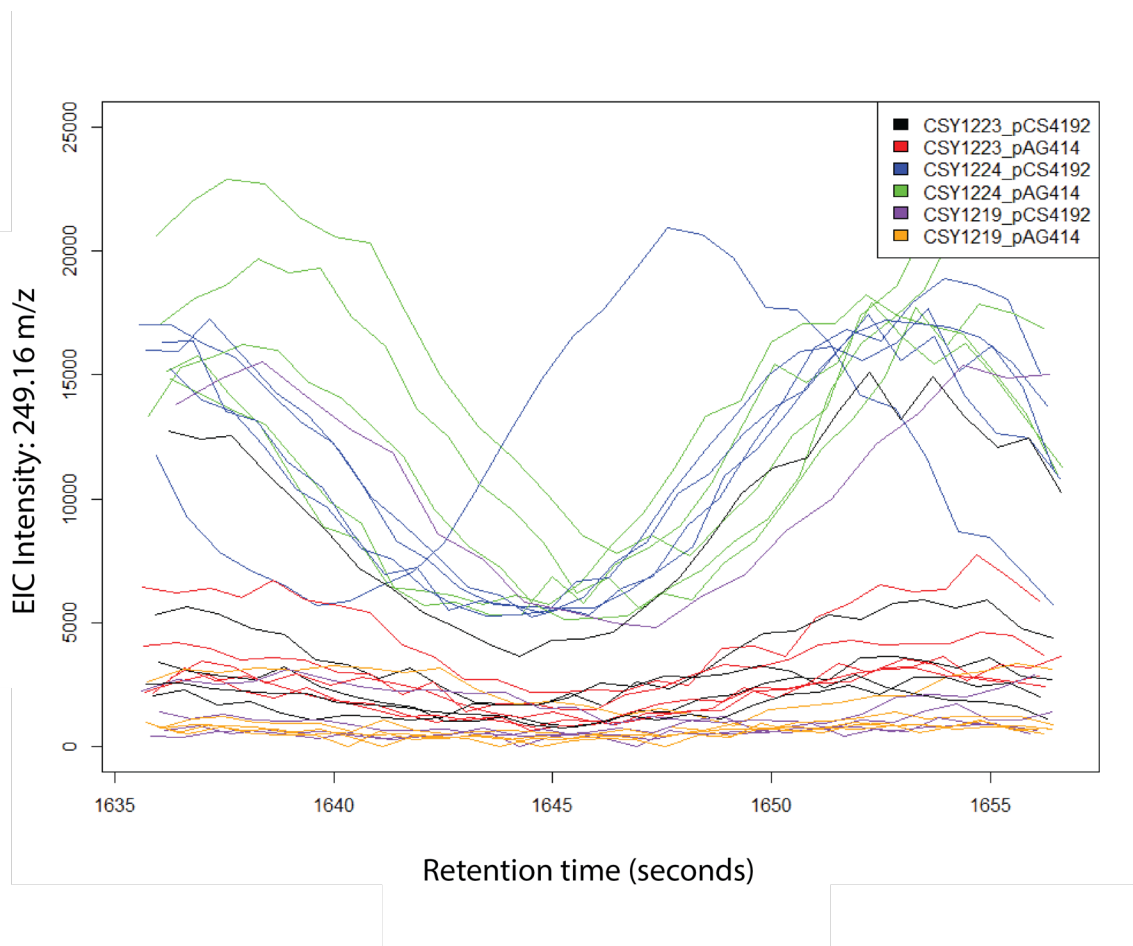

**Figure S7: Chromatograms of the candidate differentially produced ion in Sb121 expression in partial dhurrin pathway strains.** An extracted ion chromatogram is displayed for the ion identified as potentially differentially expressed by untargeted metabolomics. Strains tested are CSY1223 (partial dhurrin pathway strain expressing SbCYP79A1 and Sb120) + pCS4192 (plasmid expressing CYP71E1), CSY1223 + pAG414 (selection marker control plasmid), CSY1224 (partial dhurrin pathway strain expressing SbCYP79A1 and Sb121) + pCS4192, CSY1224 + pAG414, CSY1219 (partial dhurrin pathway strain expressing SbCYP79A1) + pCS4192, and CSY1219 + pAG414.

**Table S1: *S. bicolor* gene sequences, codon-optimized for yeast expression.**

| <b>Gene</b> | <b>Codon-Optimized Sequence</b>                                                                                                                                                                                                                                                                                                                                                                                                                                                                                                                                                                                                                                                                                                                                                                                                                                                                                                                                                                                                                                                                                                                                                                                                                                                                                                                                                                                                                                                                                                                                                                                                                                                                                                                                                                                                                                                                                                                                                                                                                                                  |
|-------------|----------------------------------------------------------------------------------------------------------------------------------------------------------------------------------------------------------------------------------------------------------------------------------------------------------------------------------------------------------------------------------------------------------------------------------------------------------------------------------------------------------------------------------------------------------------------------------------------------------------------------------------------------------------------------------------------------------------------------------------------------------------------------------------------------------------------------------------------------------------------------------------------------------------------------------------------------------------------------------------------------------------------------------------------------------------------------------------------------------------------------------------------------------------------------------------------------------------------------------------------------------------------------------------------------------------------------------------------------------------------------------------------------------------------------------------------------------------------------------------------------------------------------------------------------------------------------------------------------------------------------------------------------------------------------------------------------------------------------------------------------------------------------------------------------------------------------------------------------------------------------------------------------------------------------------------------------------------------------------------------------------------------------------------------------------------------------------|
| CYP71E1     | ATGGACTCTATCGGTAAATGCATGGATCCACAATTGCCATTGGAAATTC<br>TGTTCCAGGTGTTCCAAGAGACAGAAGAAGAATAACTAATAACCAA<br>CACTAACCCAAGAGGTTAGAGAACCAGCTTCTTCTTACATTATGCCAACT<br>AACCATACCCAACAATCCGAAGCTAAACAAGCTGAATTGGAAGCTGCTC<br>ATACTCCACATTCTTCTAGACCAGCTATTCCACAAGGTAAACAAGGTCAT<br>GGTCAATTGACTATGGCTACTACTGCTACTCCACAATTATTGGGTGGTTC<br>AGTTCCACAACAATGGCAAACCTTGTTTGGTGGTGGTGGTGGTGGTGGT<br>TGGTCAGTTACTACTTGTTGACCTCCAGATCTAGAAACAGATCAAGATCT<br>GGTAAATTAGGTGGTGGTGGTCCAAGATTGCCACCAGGTCCAGCTCAATTGC<br>CAATTTGGGTAACTTGCAATTTGTTGGGTCCATTGCCACATAAGAAGTTG<br>AGAGAATTGGCTAGAAGATACGGTCCAGTTATGCAATTGAGATTGGGTA<br>CTGTTCCAACCGTTGTTGTTTCTTCTGCTGAAGCTGCTAGAGAAGTTTTG<br>AAGGTTTTCATGATGTTGATTGCTGTTCTAGACCTGCTTCTCCAGGTCCAAA<br>AAGATTGTCTTACGATTTGAAGAACGTTGGTTTCGCTCCATATGGTGAAT<br>ATTGGAGAGAAATGAGAAAGTTGTTTCGCCTTGGAAATATTGTCCATGAG<br>AAGAGTTAAGGCTGCTTGTTACGCTAGAGAACAAGAAATGGATAGATTG<br>GTTGCCGATTTGGATAGAGCTGCTGCTTCTAAAGCTTCTATCGTTTTGAA<br>CGATCATGTTTTTCGCTTTGACCGATGGTATTATTGGTACTGTTGCTTTTCGG<br>TAACATCTACGCTTCTAAACAATTCGCCACAAAGAAAGATTCCAACAC<br>GTTTTGGATGACGCTATGGATATGATGGCTTCTTTTAGTGCTGAAGATTC<br>TTTCCAATGCTGCTGGTAGATTGGCTGATAGATTGTCTGGTTTTTTGGC<br>CAGAAGAGAAAGAATTTTCAACGAATTGGACGTTTTCTTCGAAAAGGTT<br>ATCGATCAACATATGGATCCAGCTAGACCAGTTCAGATAATGGTGGTGA<br>TTTGGTTGATGTCTTGATCAACTTGTGCAAAGAACACGATGGTACTTTG<br>AGATTCCTAGAGATCATGTTAAGGCCATTGTCTTGGATACTTTCATTGG<br>TGCTATTGACACCTCCTCTGTTACTATTTTGTGGGCTATGTCTGAATTGAT<br>GAGAAAGCCACAAGTTTTGAGAAAGGCTCAAGCTGAAGTTAGAGCTGC<br>AGTTGGTGATGATAAGCCAAGAGTTAATTCTGAAGATGCTGCCAAGATT<br>CCATACTTGAAGATGGTTGTCAAAGAAACCTTGAGATTGCATCCACCAG<br>CTACTTTGTTAGTTCCTAGAGAACTATGAGAGATAACCACCATTTGTGGT<br>TATGATGTTCCAGCTAACACCAGAGTTTTTTGTTAATGCTTGGGCTATTGG<br>TAGAGATCCTGCTTCATGGCCAGCTCCAGATGAATTCAATCCAGATAGAT<br>TCGTTGGTTCAGATGTTGACTATTACGGTTCCTATTTGAATTGATTCCAT<br>TTGGTGCCGGTAGAAGAATTTGTCCAGGTTAACTATGGGTGAAACTAA<br>CGTTACTTTTACCTTGGCCAACCTGTTGTACTGTTATGATTGGGCTTTGCC<br>AGGTGCTATGAAGCCTGAAGATGTTTCTATGGAAGAACTGGTGCTTTG<br>ACTTTCCACAGAAAACCTCCATTGGTTGTTGTCCCAACTAAGTACAAGA<br>ATAGAAGAGCTGCTTAA |
| CYP79A1     | ATGGCTACCATGGAAGTTGAAGCTGCTGCTGCTACTGTTTTGGCTGCTC<br>CTTTGTTATCTTCTTCAGCCATTTTGAAGTTGTTGTTGTTTCGTTGTCACCT<br>TGTCTTATTTGGCTAGAGCTTTGAGAAGACCAAGAAAGTCTACTACCAA<br>GTGTTCTTCTACTACTTGTGCTTCACCTCCAGCTGGTGGTGGTAATCCAC<br>CATTGCCACCAGGTCCAGTTCATGGCCAGTTGTTGGTAACTTGGCAGA<br>AATGTTGTTGAACAAGCCAGCTTTCAGATGGATTCACCAAATGATGAGA<br>GAAATGGGTACTGATATTGCCTGTGTTAAGTTGGGTGGTGGTGGTGGTGGT<br>TTCTATTACCTGTCCAGAAATCGCCAGAGAAGTTTTGAGAAAACAAGAT                                                                                                                                                                                                                                                                                                                                                                                                                                                                                                                                                                                                                                                                                                                                                                                                                                                                                                                                                                                                                                                                                                                                                                                                                                                                                                                                                                                                                                                                                                                                                                                                                                        |





|                  |                                                                                                                                                                                                                                                                                                                                                                                                                                                                                                                                                                                                                                                                                                                                                                                                                                                                                                                                                                                                                                                                                                                                                                                                                                                                                                                                                                                                                                                                                                                                                                                                                                                                                                                                                                                                                                                                                                                                                                                  |
|------------------|----------------------------------------------------------------------------------------------------------------------------------------------------------------------------------------------------------------------------------------------------------------------------------------------------------------------------------------------------------------------------------------------------------------------------------------------------------------------------------------------------------------------------------------------------------------------------------------------------------------------------------------------------------------------------------------------------------------------------------------------------------------------------------------------------------------------------------------------------------------------------------------------------------------------------------------------------------------------------------------------------------------------------------------------------------------------------------------------------------------------------------------------------------------------------------------------------------------------------------------------------------------------------------------------------------------------------------------------------------------------------------------------------------------------------------------------------------------------------------------------------------------------------------------------------------------------------------------------------------------------------------------------------------------------------------------------------------------------------------------------------------------------------------------------------------------------------------------------------------------------------------------------------------------------------------------------------------------------------------|
|                  | <p>TTGTTTCGTTTCTCATTGTGGTTGGAACCTCATTATTGGAAGCTACAGCTGC<br/> TGGTCAACCAGTTTTGGCTTGGCCATGTCATGGTGAACAACTACAAAC<br/> TGTAGACAATTGTGTGAAGTTTGGGGTAATGGTGCTCAATTGCCAAGAG<br/> AAGTAGAATCTGGTGCTGTTGCTAGATTGGTTAGAGAAATGATGGTCGG<br/> TGATTTGGGTAAAGAAAAGAGAGCTAAAGCTGCAGAATGGAAAGCTGC<br/> TGCCGAAGCTGCCGCTAGAAAAGGTGGTGCTTCTTGGAGAAATGTTGA<br/> AAGAGTTGTAAACGACTTGTATTGGTCGGTGGTAAGCAATGA</p>                                                                                                                                                                                                                                                                                                                                                                                                                                                                                                                                                                                                                                                                                                                                                                                                                                                                                                                                                                                                                                                                                                                                                                                                                                                                                                                                                                                                                                                                                                                                                                                      |
| Sobic.001G012000 | <p>ATGGCTGCTGTTTCATGTTATAGTTGAAGGTGGTTCTTCTTCCTCTCCACA<br/> ACATCAACACCAACAATGGAGATTGACTTTGGTTTTGGCTGTTGTTGTTT<br/> CATTGGTTTTCTTGATTTTGTGGCTAGAACTAGAACCAGAAGAAGAGC<br/> TAAATCTGGTTCCTCTACTGAAAAGGGTAGAAGATTATTGCATTTGCCAC<br/> CAGGTCCACCAACTTTGCCAATTTGGGTAACCTGCATCAATTGGGTGCT<br/> TTGCCACATCAATCTTTGAGAGAATTAGCTAGAAGACACGGTCCAGTTA<br/> TGTTGTTGAGATTGGGTTCTGTTCCAACCTTGGTTGTTTCTTCTGCTGAA<br/> GCTGCTAGAGAAGTTATGAAAAGTAGAGATGCTGATTGCTGCTCTAGAC<br/> CAGATACTCCAGGTGCTAGAAGATTGTCTTATGGTCATAAGGATGTTGCC<br/> TTTTCTCCATACGGTGATTATTGGAGAGATATGAGAAAGTTGTTTCGTCGT<br/> CGAATTCTTGTCTGCAAGAAGAGTTAGAGCTGCAGATTATGCAAGAGAA<br/> GCTGAAGTTGATAAGTTGATCGGTAGATTGTCCTTGTTCATCTTCAGCTGG<br/> TGGTAGACCAGTTAGATTGGAAGATCATATCTTCAGATTGATGGATGGTG<br/> TTATTGGTACTGTTGCTTTCGGTAATATCTACGGTACTGAACAATTCGCCC<br/> ATAAGAAACATTTCCACGATGTTTTGGATGAAGCTATGTCTGCTAAAGCT<br/> GGTTTTTCCGCTGAAGATTACTATCCAAATGCTGCCGGTAGATTATTAGAT<br/> AGATTGACTGGTGCTGCTGCCAGAAGAGAAAGAGTTTTTAGAGATTGG<br/> ATGCCTTCTTCGATACCATCATCGATCAACATTTGGTTAATCCACCACCAT<br/> CTAGAGCTACTACACCAGGTGGTGCTGGTCATGGTCCAGATTTGATTGAT<br/> GTTTTTGTTCGATTTGATGGAAATGGAAGAAAGACAAGTTGACGGTTCTT<br/> TCAGATTCCTAGAGATCACATTAAGGGTTTTGTTGTCCAACGTTTTCACT<br/> GCTTCTGTTGATACTTCTTCCGTTACTATGGTTTGGGCTATGGCTGAATTG<br/> ATGAGAAGACCAGCTATGTTGAGAAAGGCTCAAGAAGAAGTAAGATCT<br/> GTTGTAGGTGGTGGTGGTAGAGAACTGAAAGAGTTCATCCAGACGAC<br/> GTTGCTAAATTGAGATACTTGAAAGCCGTTGTCAAAGAAACCTTGAGAT<br/> TGCATCCAGCTGCACCTTTGTTGTTGCCAAGAGAACTTTAAGACAAGT<br/> CTCCATTTGCGGTTATGATGTTCCAGCTAAAACCAGAGTTTTGGTTAACG<br/> CTTGGGCTATTGGTAGAGATCCAAGATCATGGGGTGATAGACCTGAAGA<br/> ATTTGATCCAGATAGATTCAATGACGGTGGTGGTGGTTTAAATGGTA<br/> CTCATTTTGAATTGGTTCCATTCGGTGCTGGTAGAAGAATGTGTCCAGGT<br/> ATGGGTATGGGTGTTGCTACTGTTGAATTCATTTGGCTAACTTGTTGTA<br/> CTGCTTCGATTGGGAATTGCCAGATGGTGTAGGTGTTGACGATGTTTCTA<br/> TGCAAGAAGCCGGTGGTTTGTCTGTTTATAAGAAAACCCCTTTGTTATTA<br/> GTCCCAACCAGATACAAGTGCAGATCAAGAGATCAATCCTTGGTTTCTA<br/> CCCAATGA</p> |
| Sobic.001G012101 | <p>ATGGGTGATGCTTACGCTAAGAGAGTTTTGTTGACTGCTGCTGGTGATG<br/> CTGTTTCTAGAGGTATTGCTTCTACTTTGGCTAAACATGGTTGCAGATTG<br/> GTTTTGTTGGGTGATGAAGGTGCTTTGGCTGCTACTGCTGAAGAAGCTA<br/> GAAGATGTGGTGACGGCGGTGGTGGTGGTGAATTGGTTGGTTTGGATT<br/> GGAAGCTTGTGGTGAAGCTGCTGCAGATGCTGCTGTTGATAGAGCTTGG<br/> AGATGTTTTGCTGGTTTAGATGCTTTCGTTAACTGCTACTCTTACGAAGG<br/> TGAAGTTCAAGATTGCTTGTCCATCTCTGAAGATGAATACAGAAAGACC</p>                                                                                                                                                                                                                                                                                                                                                                                                                                                                                                                                                                                                                                                                                                                                                                                                                                                                                                                                                                                                                                                                                                                                                                                                                                                                                                                                                                                                                                                                                                                                                                              |

|                                                                                                                                                                                                                                                                                                                                                                                                                                                                                                                |
|----------------------------------------------------------------------------------------------------------------------------------------------------------------------------------------------------------------------------------------------------------------------------------------------------------------------------------------------------------------------------------------------------------------------------------------------------------------------------------------------------------------|
| ATCAAGGTTAACGTTGTTACTCCATGGTTTTTGGATGAAGGCTATTGCCAA<br>GAGATTCCAAGATACAAAATCTGGTGGTTCCATCGTTTTCTTGACCCAA<br>ATTATTGGTGCTGAAAGAGGTTTGTATCCAGGTGCTGCTGCTTATGGTAC<br>TTCTTTGGGTGCTATTCATCAATTGGTTAGATTGTCCGCTATGGAATTGGG<br>TAAGCACAAGATTAGAGTTAACGCTGCTTGTAGAGGTTTACACTTGCAA<br>GATAAGTCCCAGTTTCCGTCGGTAAAGAAAAAGCTGAAAAAGCAACT<br>GCTGTTGTTATGCCATTGAGAAGATGGTTGGATCCAGAAAAAGATTGG<br>CTTCTATGGTCTTGTACTTGGTTGGTGACGAATCTAGATATATGACCGGTA<br>CTACCATTTTCGTTGATGGTGCTCAATCTATCGTTAGACCAAGAATGAGA<br>TCCTTCATGTAA |
|----------------------------------------------------------------------------------------------------------------------------------------------------------------------------------------------------------------------------------------------------------------------------------------------------------------------------------------------------------------------------------------------------------------------------------------------------------------------------------------------------------------|

**Table S2: Plasmids used in this work.**

| <b>Plasmid</b> | <b>Description</b>                                             | <b>Ref.</b> |
|----------------|----------------------------------------------------------------|-------------|
| pAG414GAL-ccdB | Centromeric TRP1, attR1-pGAL-ccdB-attR2                        | 24          |
| pAG414GPD-ccdB | Centromeric TRP1, attR1-pGPD-ccdB-attR2                        | 24          |
| pCS1056        | Centromeric KanR, attR1-pGPD-ccdB-attR2                        | 30          |
| pCS1748        | Centromeric URA3, pTEF1-GFP-tADH1; pTEF1-mCherry-tCYC1         | 25          |
| pCS4182        | pGPD-SbCYP71E1-tADH1                                           | This work   |
| pCS4183        | pTEF1-SbCYP79A1-tCYC1                                          | This work   |
| pCS4184        | pTPI1-SbUGT85B1-tSTE2                                          | This work   |
| pCS4185        | pPGK1-Sobic.001G012000-tPHO5                                   | This work   |
| pCS4186        | pPYK1-Sobic.001G012101-tMFA1                                   | This work   |
| pCS4187        | Centromeric KanR, CRISPR construct for LEU2 locus insertion    | This work   |
| pCS4188        | Centromeric KanR, CRISPR construct for LYP1 locus insertion    | This work   |
| pCS4189        | Centromeric KanR, CRISPR construct for YBR197C locus insertion | This work   |
| pCS4190        | attL1-SbCYP71E1-tADH1-attL2                                    | This work   |
| pCS4191        | Centromeric TRP1, pGAL1-attB1-SbCYP71E1-tADH1-attB2            | This work   |
| pCS4192        | Centromeric TRP1, pGPD-attB1-SbCYP71E1-tADH1-attB2             | This work   |

**Table S3: Primers used to assemble *S. bicolor* promoter-gene-terminator cassette plasmids.**

| <b>Final Plasmid</b> | <b>Backbone</b> | <b>Gene</b> | <b>Primer Binding Site</b>      | <b>Primer Sequence</b>                                            |
|----------------------|-----------------|-------------|---------------------------------|-------------------------------------------------------------------|
| pCS4182              | pCS2656         | SbCYP71E1   | Backbone Forward Primer         | agaatagaagagctgcttaacgcgccacttct<br>aaataagcgaattct               |
| pCS4182              | pCS2656         | SbCYP71E1   | Backbone Reverse Primer         | catttaccgatagagtcattgtataggatccac<br>tagttctagaatccgctcg          |
| pCS4182              | pCS2656         | SbCYP71E1   | Gene Forward Primer             | gaactagtggatcctatacaatggactctatcg<br>gtaaatgcatggatcc             |
| pCS4182              | pCS2656         | SbCYP71E1   | Gene Reverse Primer             | gcttatttagaagtggcgcttaagcagctcttc<br>tattctgtacttagtgggac         |
| pCS4182              | pCS2656         | SbCYP71E1   | Promoter Sequencing Primer      | ccttctattaccttctgctctctctgattgg                                   |
| pCS4182              | pCS2656         | SbCYP71E1   | Terminator Sequencing Primer    | cctacaggaagagttactcaagaataagaat<br>tttctg                         |
| pCS4182              | pCS2656         | SbCYP71E1   | Gene Midpoint Sequencing Primer | gagagaattggctagaagatacggccag                                      |
| pCS4183              | pCS2657         | SbCYP79A1   | Backbone Forward Primer         | accatctatttctatctgactcgagtcattgatt<br>agttagtgcagcttacat          |
| pCS4183              | pCS2657         | SbCYP79A1   | Backbone Reverse Primer         | tcaacttccatggtagccattgtatacctaggaa<br>aacttagattagattgctatgctttct |
| pCS4183              | pCS2657         | SbCYP79A1   | Gene Forward Primer             | Taagtttcttaggtatacaatggctaccatgg<br>aagttgaagctg                  |
| pCS4183              | pCS2657         | SbCYP79A1   | Gene Reverse Primer             | taactaatacatgactcgagtcagatagaaata<br>gatgggtacaagtgagctgg         |
| pCS4183              | pCS2657         | SbCYP79A1   | Promoter Sequencing Primer      | cgatgacctccattgatatttaagttaataaac<br>gg                           |
| pCS4183              | pCS2657         | SbCYP79A1   | Terminator Sequencing Primer    | cctagacttcaggttgctaaactccttc                                      |
| pCS4183              | pCS2657         | SbCYP79A1   | Gene Midpoint Sequencing Primer | cagaaatgccgttttgtctccatattggg                                     |
| pCS4184              | pCS2661         | SbUGT85B1   | Backbone Forward Primer         | tggtcggtggaagcaatgatcaaaatttacgg<br>ctttgaaaaagtaatttc            |
| pCS4184              | pCS2661         | SbUGT85B1   | Backbone Reverse Primer         | ggtggagcattagaaccattgtatatttagttt<br>atgtatgtgtttttgtagttatagat   |
| pCS4184              | pCS2661         | SbUGT85B1   | Gene Forward Primer             | tacataaactaaatatacaatgggttctaagtc<br>tccaccacca                   |
| pCS4184              | pCS2661         | SbUGT85B1   | Gene Reverse Primer             | ttcaaagccgtaattttgatcattgcttaccacc<br>gaccaataacaag               |

|         |         |                  |                                 |                                                                       |
|---------|---------|------------------|---------------------------------|-----------------------------------------------------------------------|
| pCS4184 | pCS2661 | SbUGT85B1        | Promoter Sequencing Primer      | cagggaaataaaagggcagcataatntagga<br>t                                  |
| pCS4184 | pCS2661 | SbUGT85B1        | Terminator Sequencing Primer    | gaatgtggtgcatctgatgagcac                                              |
| pCS4184 | pCS2661 | SbUGT85B1        | Gene Midpoint Sequencing Primer | ctttgctgctgctgcagctagaga                                              |
| pCS4185 | pCS2663 | Sobic.001G012000 | Backbone Forward Primer         | ccttggttctaccaatgattttgtataactaaat<br>aatattggaaactaaatacgaatacc      |
| pCS4185 | pCS2663 | Sobic.001G012000 | Backbone Reverse Primer         | ataacatgaacagcagccattgtatatattgtt<br>gtaaaaagtagataaattctcctg         |
| pCS4185 | pCS2663 | Sobic.001G012000 | Gene Forward Primer             | tttacacaaatatatacaatggctgctgttcat<br>gttatagttgaagg                   |
| pCS4185 | pCS2663 | Sobic.001G012000 | Gene Reverse Primer             | tattatttagttatacaaaatcattgggtagaaac<br>caaggattgatctctg               |
| pCS4185 | pCS2663 | Sobic.001G012000 | Promoter Sequencing Primer      | ctaaccaagggggtggttttagtttagtagaac                                     |
| pCS4185 | pCS2663 | Sobic.001G012000 | Terminator Sequencing Primer    | catccatttacctgttccgatatctctgc                                         |
| pCS4185 | pCS2663 | Sobic.001G012000 | Gene Midpoint Sequencing Primer | gttgcctttctccatacggtgattattgg                                         |
| pCS4186 | pCS2664 | Sobic.001G012101 | Backbone Forward Primer         | gaatgagatcctcatgtaagcccgactgataa<br>caacagtgtagatgta                  |
| pCS4186 | pCS2664 | Sobic.001G012101 | Backbone Reverse Primer         | ttagcgtgaagcatcaccattgtataatgtttatt<br>tgtttgattggtgtcttgtaaatagaacaa |
| pCS4186 | pCS2664 | Sobic.001G012101 | Gene Forward Primer             | aacaataaaacattatacaatgggtgatgctt<br>acgctaagagagtttt                  |
| pCS4186 | pCS2664 | Sobic.001G012101 | Gene Reverse Primer             | actgttggtatcagtcgggcttacatgaaggatc<br>tcattctggtctaacgatagattg        |
| pCS4186 | pCS2664 | Sobic.001G012101 | Promoter Sequencing Primer      | gatttccttctccatgatgatgctaggt                                          |
| pCS4186 | pCS2664 | Sobic.001G012101 | Terminator Sequencing Primer    | gggaaaacatgttgtttacggagaaatgaaaa<br>g                                 |
| pCS4186 | pCS2664 | Sobic.001G012101 | Gene Midpoint Sequencing Primer | tggatttgaagcttgggtgaagc                                               |

**Table S4: Other PCR primers used in this work.**

| <b>Oligo Name</b>       | <b>Sequence</b>                                                                | <b>Use</b>                                                                         |
|-------------------------|--------------------------------------------------------------------------------|------------------------------------------------------------------------------------|
| M13F                    | gtaaacgacggccagtcttaagc                                                        | Sequence-verify pCS4182-8 and pCS4192                                              |
| M13R-extended-seq-R     | agagctgccaggaaacagctatgac                                                      | Sequence-verify pCS4182-8 and pCS4192                                              |
| attB-Sb122gt-F          | ggggacaagttgtacaaaaagcaggctcctatacaatggactctatc<br>ggtaaatgcatgcatcc           | Generate pCS4192                                                                   |
| attB-Sb122gt-R          | ggggaccactttgtacaagaaagctgggtcgatctgccgtagaggtg<br>tggtc                       | Generate pCS4192                                                                   |
| pCS1056-LYP1-F          | gcttgaaccatttttatgccaagccctaaacgccgcaatgcatag<br>cttcaaatgtttctactcctttttactct | Integrate AtATR1 cassette from pCS1056 into LYP1 locus                             |
| pCS1056-LYP1-R          | gccaaaaactgccgtgcccacagatgtatgtttttgagcaaattaa<br>gccttcgagcgtcccaa            | Integrate AtATR1 cassette from pCS1056 into LYP1 locus                             |
| LYP1-cPCR-F             | gctcctattgccattggagaaaaccc                                                     | Colony PCR test of AtATR1-LYP1 integration                                         |
| LYP1-cPCR-R             | gcatgggtaatttgtgtgatgtgcg                                                      | Colony PCR test of AtATR1-LYP1 integration                                         |
| pCS1056-cPCR-N_terminus | acttgagctgcttaacaaatcggaagc                                                    | Colony PCR test of AtATR1-LYP1 integration                                         |
| pCS1056-cPCR-C_terminus | gcagaggtatagttaagaaacttcaaacgg                                                 | Colony PCR test of AtATR1-LYP1 integration                                         |
| pCS4183-LEU2-F          | aggtatttactttgtaagagaaaggaagacaaattaaagccttcgagc<br>gtccc                      | Integrate SbCYP79A1 cassette from pCS4183 into LEU2 locus                          |
| pCS4184-LEU2-F          | aggtatttactttgtaagagaaaggaagacggacctaataacattcag<br>aact                       | Integrate SbUGT85B1 cassette from pCS4184 into LEU2 locus                          |
| pCS4184-pCS4183-R       | gaaggctttaatttgaactcgtaaaagcaaaggtggt                                          | Amplify SbUGT85B1 cassette from pCS4184 with homology to pCS4183 for DNA assembler |
| pCS4183-pCS4184-F       | gcttttacgagttcacaattaaagccttcgagcgtccc                                         | Amplify SBCYP79A1 cassette from pCS4183 with homology to pCS4184 for DNA assembler |
| pCS4183-pCS1748-R       | aataatggtttcttaatatgcatagcttcaaatgttcc                                         | Amplify SBCYP79A1 cassette from pCS4183 with                                       |

|                       |                                                        |                                                                                           |
|-----------------------|--------------------------------------------------------|-------------------------------------------------------------------------------------------|
|                       |                                                        | homology to pCS1748 for DNA assembler                                                     |
| pCS1748-pCS4183-F     | tgaagctatgcatattaagaaaccattattatcatgaca                | Amplify URA3 cassette from pCS1748 with homology to pCS4183 for DNA assembler             |
| pCS1748-LEU2-R        | ttcactatcccaagcgacaccatcaccatccactcaaccctatctcggtctatt | Integrate URA3 cassette from pCS1748 into LEU2 locus                                      |
| pCS1748-pCS4182-R     | ctctaccggcagatccactcaaccctatctcggtctatt                | Amplify URA3 cassette from pCS1748 with homology to pCS4182 for DNA assembler             |
| pCS4182-pCS1748-F     | agataggggttgagtggatctgccgtagaggtgtggca                 | Amplify SbCYP71E1 cassette from pCS4182 with homology to pCS1748 for DNA assembler        |
| pCS1748-pCS4185-R     | aaaaggaagagtgaacactcaaccctatctcggtctatt                | Amplify URA3 cassette from pCS1748 with homology to pCS4185 for DNA assembler             |
| pCS4185-pCS1748-F     | agataggggttgagtgtcactcttcttttttcat                     | Amplify Sobic.001G012000 cassette from pCS4185 with homology to pCS1748 for DNA assembler |
| pCS4182-LEU2-R        | ttcactatcccaagcgacaccatcaccatcgagctcttcgagttatcattatc  | Integrate SbCYP71E1 cassette from pCS4182 into LEU2 locus                                 |
| pCS4185-LEU2-R        | ttcactatcccaagcgacaccatcaccatcaggcatttgaagaattactcgtg  | Integrate Sobic.001G012000 cassette from pCS4185 into LEU2 locus                          |
| LEU2-cPCR-F           | caagccacaatttgctaaaggtactgacttc                        | Colony PCR test of dhurrin cluster-LEU2 integration                                       |
| LEU2-cPCR-R           | ggccaaaacattagctttatccaaggacc                          | Colony PCR test of dhurrin cluster-LEU2 integration                                       |
| pCS1748-cPCR-C        | tcgcgttaaatTTTgttaaatcagctcatttttaacc                  | Colony PCR test of dhurrin cluster-LEU2 integration                                       |
| pCS1748-cPCR-N        | gaattacaatcaataccgacgaaagggcc                          | Colony PCR test of dhurrin cluster-LEU2 integration                                       |
| pCS4182-cPCR-N (pGPD) | gtgtcatcatttactccaggcaggttg                            | Colony PCR test of dhurrin cluster-LEU2 integration                                       |
| pCS4182-cPCR-C        | agcctgaagatgtttctatggaagaaactgg                        | Colony PCR test of dhurrin cluster-LEU2 integration                                       |
| pCS4183-cPCR-N        | gtagtagaagaacacttgtagtagactttctgg                      | Colony PCR test of dhurrin cluster-LEU2 integration                                       |



|                        |                                                                                 |                                                                                  |
|------------------------|---------------------------------------------------------------------------------|----------------------------------------------------------------------------------|
| pCS4183-cPCR-C         | gaagcagttgattgtctgaatctaagtccg                                                  | Colony PCR test of dhurrin cluster-LEU2 integration                              |
| pCS4184-cPCR-N         | tggaacaaaacaacatgtggagttgg                                                      | Colony PCR test of dhurrin cluster-LEU2 integration                              |
| pCS4184-cPCR-C         | gaaaagagagctaaagctgcagaatggaaag                                                 | Colony PCR test of dhurrin cluster-LEU2 integration                              |
| pCS4185-cPCR-N         | ccaaagtcaatctccattgttggtgtgatg                                                  | Colony PCR test of dhurrin cluster-LEU2 integration, pCS4185-YBR197C integration |
| pCS4185-cPCR-C         | gaattgccagatggtgtaggtgtgac                                                      | Colony PCR test of dhurrin cluster-LEU2 integration, pCS4185-YBR197C integration |
| pCS4186-cPCR-N (pPYK1) | ccatttagcttgccggaaaaacttccgg                                                    | Colony PCR test of pCS4186-YBR197C integration                                   |
| pCS4186-cPCR-C         | ggtgctcaatctatcgtagaccaagaatgag                                                 | Colony PCR test of pCS4186-YBR197C integration                                   |
| pCS4185-YBR197C-F      | ccacgcctccagcactaaacccttaacgaccagcattagaggcattgcaagaattactcgtgagtaagg           | Integrate Sobic.001G012000 cassette from pCS4185 into YBR197C locus              |
| pCS4185-YBR197C-R      | gctaccatttacgcttctttcgtatgcagtattaccctattcactcttccttttttcattttgcatgccc          | Integrate Sobic.001G012000 cassette from pCS4185 into YBR197C locus              |
| pCS4186-YBR197C-F      | ccacgcctccagcactaaacccttaacgaccagcattagaaaatagccgcatgaccccg                     | Integrate Sobic.001G012101 cassette from pCS4186 into YBR197C locus              |
| pCS4186-YBR197C-R      | gctaccatttacgcttctttcgtatgcagtattaccctagaattctcttaggattcgattcacattcatcttttttagc | Integrate Sobic.001G012101 cassette from pCS4186 into YBR197C locus              |
| YBR197C-cPCR-F         | tggttcaattaaaggcaaagagcgacaaaag                                                 | Colony PCR test of integrations into YBR197C                                     |
| YBR197C-cPCR-R         | gtatcgatttcagaccatgatacgtcttgc                                                  | Colony PCR test of integrations into YBR197C                                     |

**Table S5: Yeast strains used in this work.**

| <b>Strain</b> | <b>Genotype</b>                                                                                        |
|---------------|--------------------------------------------------------------------------------------------------------|
| CEN.PK2       | MAT $\alpha$ URA3-52; TRP1-289; LEU2-3/112; HIS3 $\Delta$ 1; MAL2-8C; SUC2                             |
| CSY1212       | CEN.PK2 LEU2 $\Delta$ ::pTPI1-SbUGT85B1-tSTE2, pTEF1-CYP79A1-tCYC1, URA3, pGPD-CYP71E1-tADH1           |
| CSY1213       | CSY1212 LYP1 $\Delta$ ::pTEF1-AtATR1-tCYC1                                                             |
| CSY1214       | CSY1213 YBL059W $\Delta$ ::ARO4 Q166K, ARO7 T226I, hphNTI, pGPD-TKL1-tADH1                             |
| CSY1215       | CEN.PK2 YBL059W $\Delta$ ::ARO4 Q166K, ARO7 T226I, hphNTI, pGPD-TKL1-tADH1                             |
| CSY1216       | CSY1215 LEU2 $\Delta$ ::pTPI1-SbUGT85B1-tSTE2, pTEF1-CYP79A1-tCYC1, URA3, pGPD-CYP71E1-tADH1           |
| CSY1217       | CSY1215 LYP1 $\Delta$ ::pTEF1-AtATR1-tCYC1                                                             |
| CSY1218       | CSY1217 LEU2 $\Delta$ ::URA3                                                                           |
| CSY1219       | CSY1217 LEU2 $\Delta$ ::pTEF1-CYP79A1-tCYC1                                                            |
| CSY1220       | CSY1217 LEU2 $\Delta$ ::pTPI1-SbUGT85B1-tSTE2, pTEF1-CYP79A1-tCYC1, URA3, pPGK1-Sobic.001G012000-tPHO5 |
| CSY1221       | CSY1214 YBR197C $\Delta$ ::pPGK1-Sobic.001G012000-tPHO5                                                |
| CSY1222       | CSY1214 YBR197C $\Delta$ ::pPYK1-Sobic.001G012101-tMFA1                                                |
| CSY1223       | CSY1219 YBR197C $\Delta$ ::pPGK1-Sobic.001G012000-tPHO5                                                |
| CSY1224       | CSY1219 YBR197C $\Delta$ ::pPYK1-Sobic.001G012101-tMFA1                                                |
